# Supplementary material for: Development of a bisphenol A based chemosensor for Al3+ and its application in cell imaging and plant root imaging
Source: Royal Society of Chemistry journal article supplement (doi:10.1039/d4ay01058b), 2024-01-01
Supplement: d4ay01058b1.pdf [file d4ay01058b1.pdf]

**Development of a bisphenol A based chemosensor for Al<sup>3+</sup> and its application in cell imaging as well as in plant root imaging**

Sibshankar Bari,<sup>a</sup> Dinesh Maity,<sup>b</sup> Deepanjan Mridha,<sup>c</sup> Tarit Roychowdhury,<sup>c</sup> Pritam Ghosh<sup>d</sup> and Partha Roy<sup>a</sup>

<sup>a</sup> Department of Chemistry, Jadavpur University, Kolkata, 700032, India

Email address: partha.roy@jadavpuruniversity.in

<sup>b</sup> Department of Chemistry, Government General Degree College, Mangalkote, Purba Bardhaman 713132, India

<sup>c</sup> School of Environmental Studies, Jadavpur University, Kolkata, 700032, India

<sup>d</sup> Department of Chemistry, Humboldt-Universität zu Berlin, Brook-Taylor-Straße 2, Berlin 12489, Germany

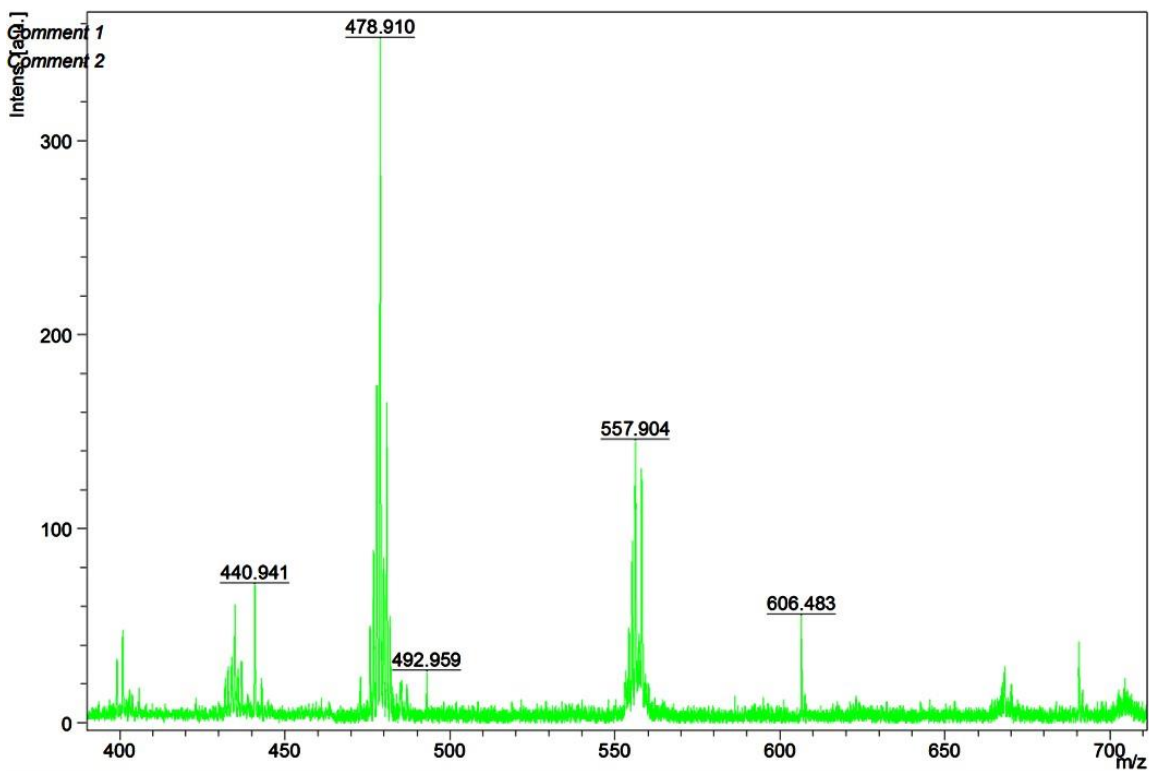

Fig. S1 ESI mass spectrum of NO<sub>2</sub>-H<sub>4</sub>L in methanol.

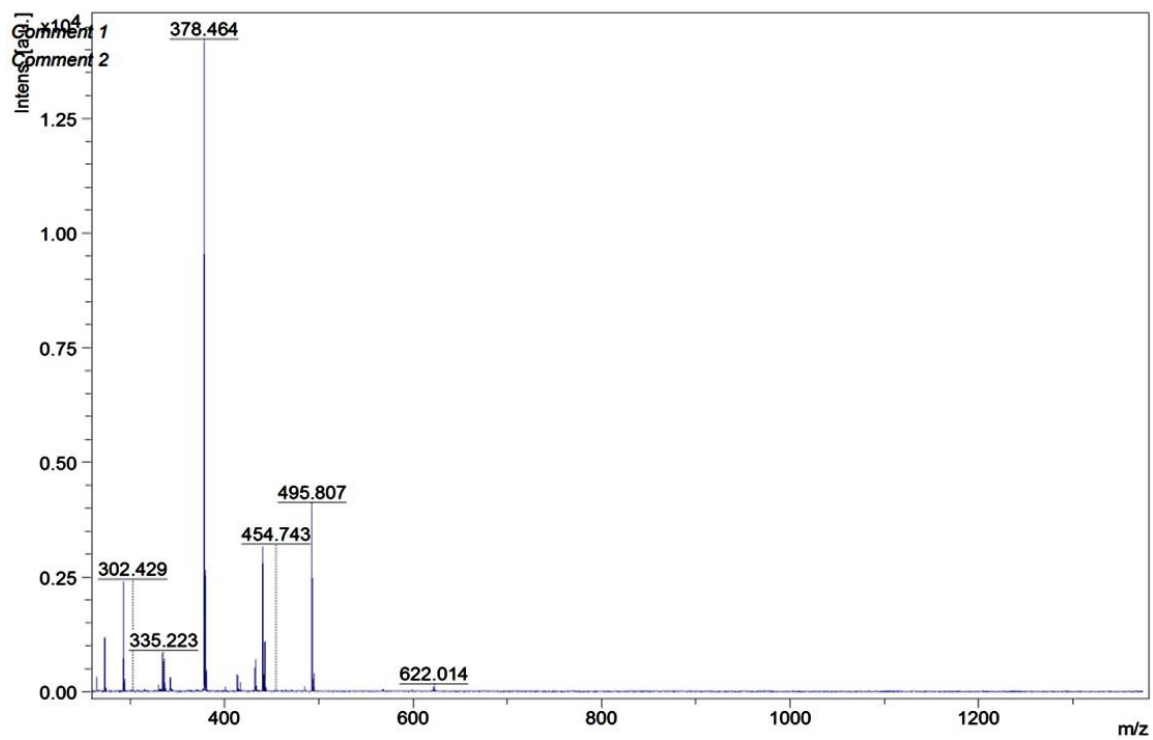

Fig. S2 ESI mass spectrum of Me-H<sub>4</sub>L in methanol.

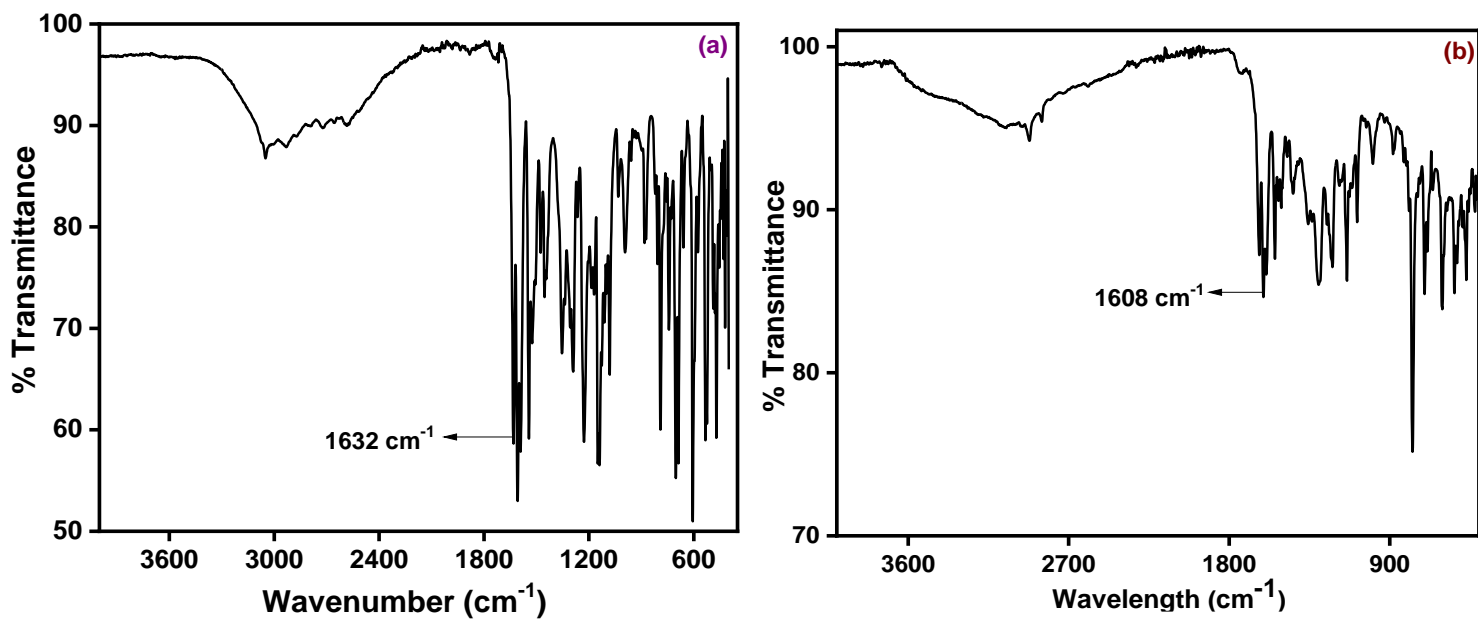

**Fig. S3** FT-IR spectra of (a) Me-H<sub>4</sub>L and (b) its complex with Al<sup>3+</sup>.

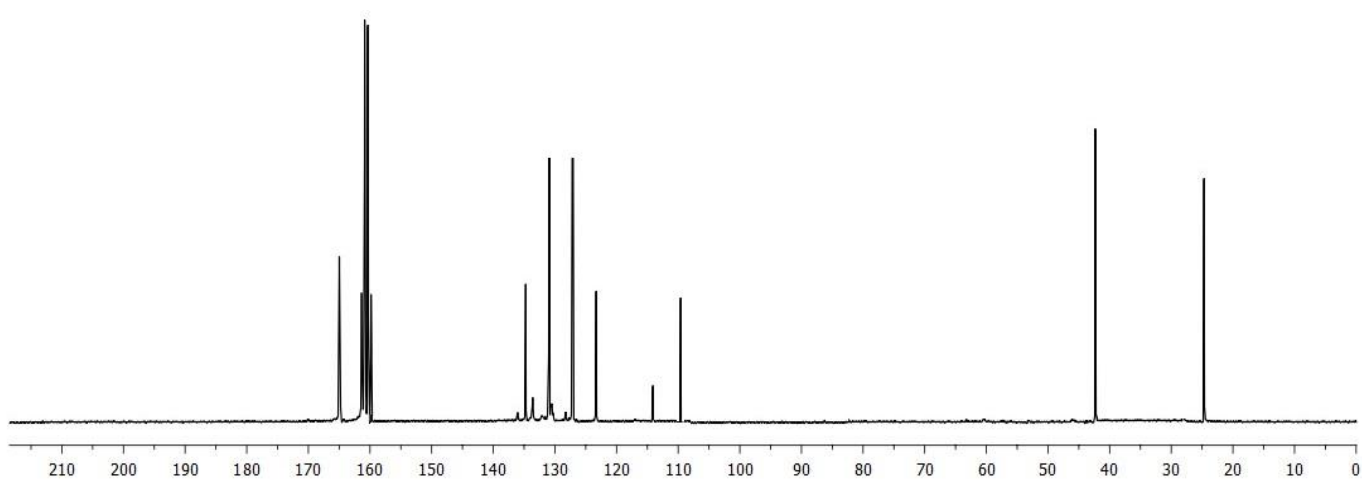

**Fig. S4** <sup>13</sup>C NMR spectrum of Me-H<sub>4</sub>L in DMSO-d<sub>6</sub>.

PR(1)SBNitro  
PR(1)SBNitro-13C

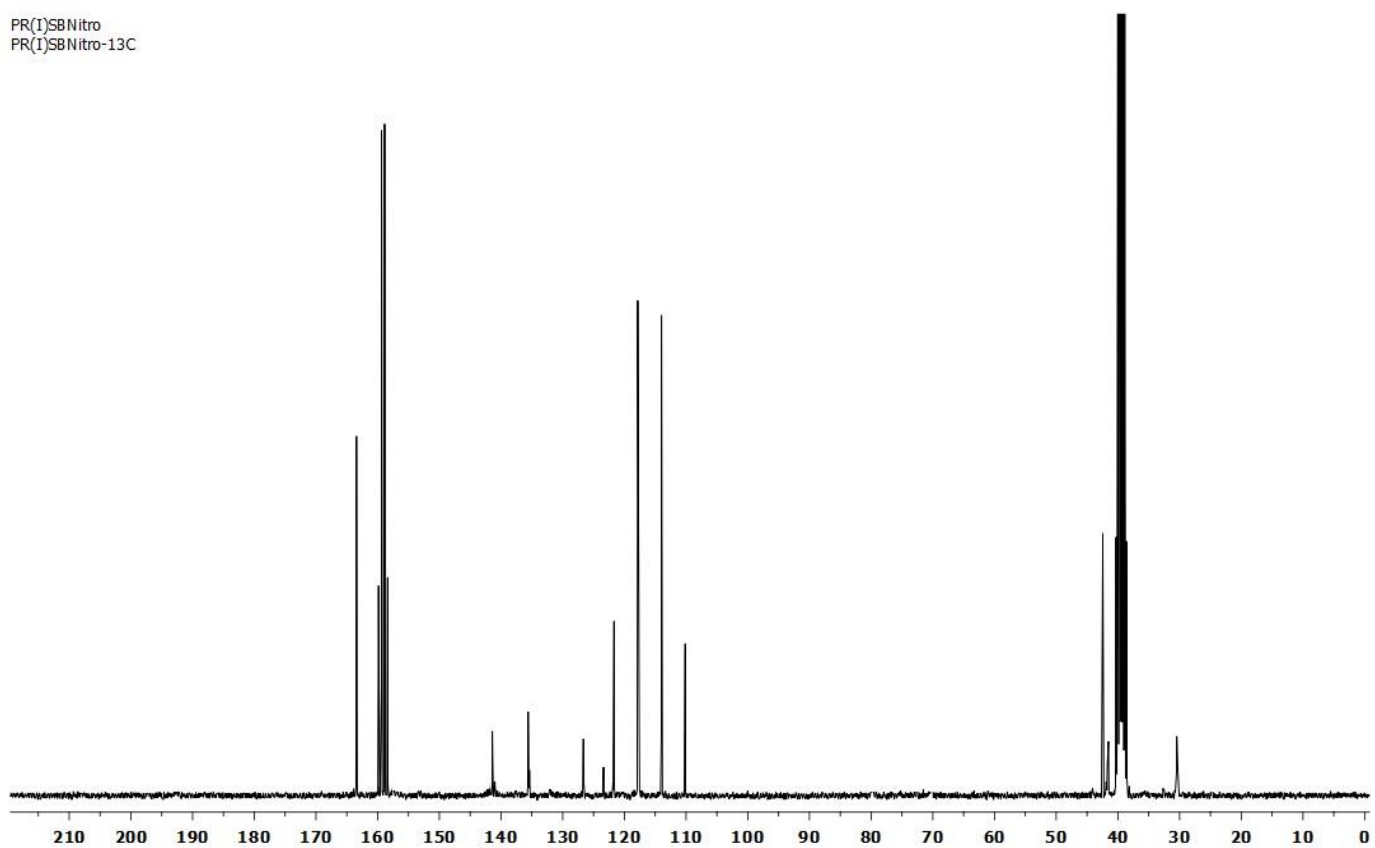

**Fig. S5**  $^{13}\text{C}$  NMR spectrum of  $\text{NO}_2\text{-H}_4\text{L}$  in  $\text{DMSO-d}_6$ .

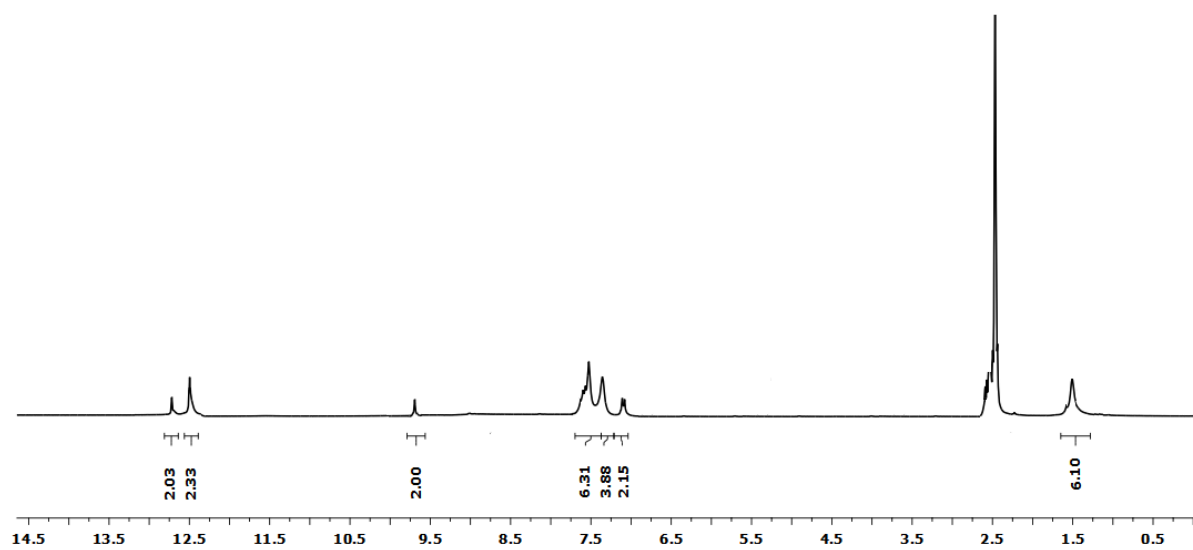

**Fig. S6**  $^1\text{H}$  NMR spectrum of  $\text{NO}_2\text{-H}_4\text{L}$  in  $\text{DMSO-d}_6$

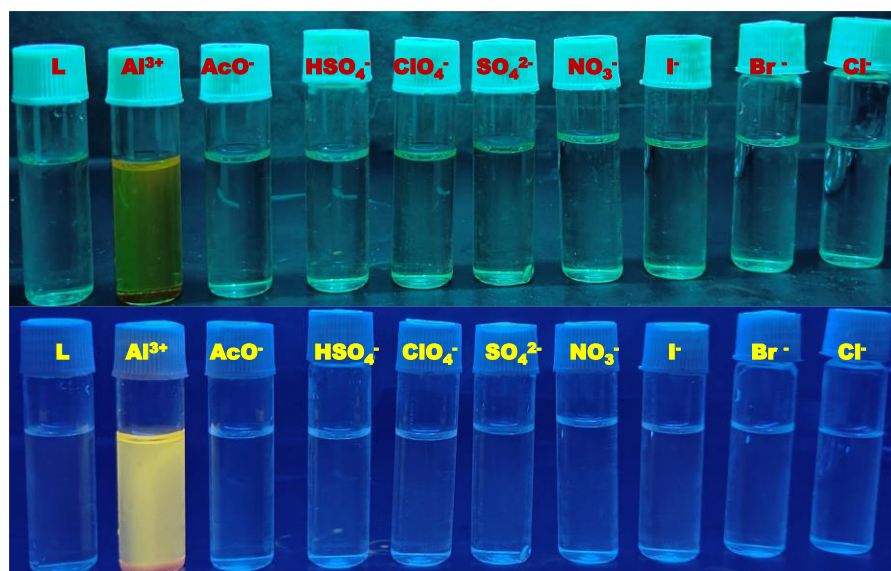

**Fig. S7** Color of Me-H<sub>4</sub>L in the presence of various anions viewed under normal light (upper row) and UV light (lower row). L in the picture denotes Me-H<sub>4</sub>L.

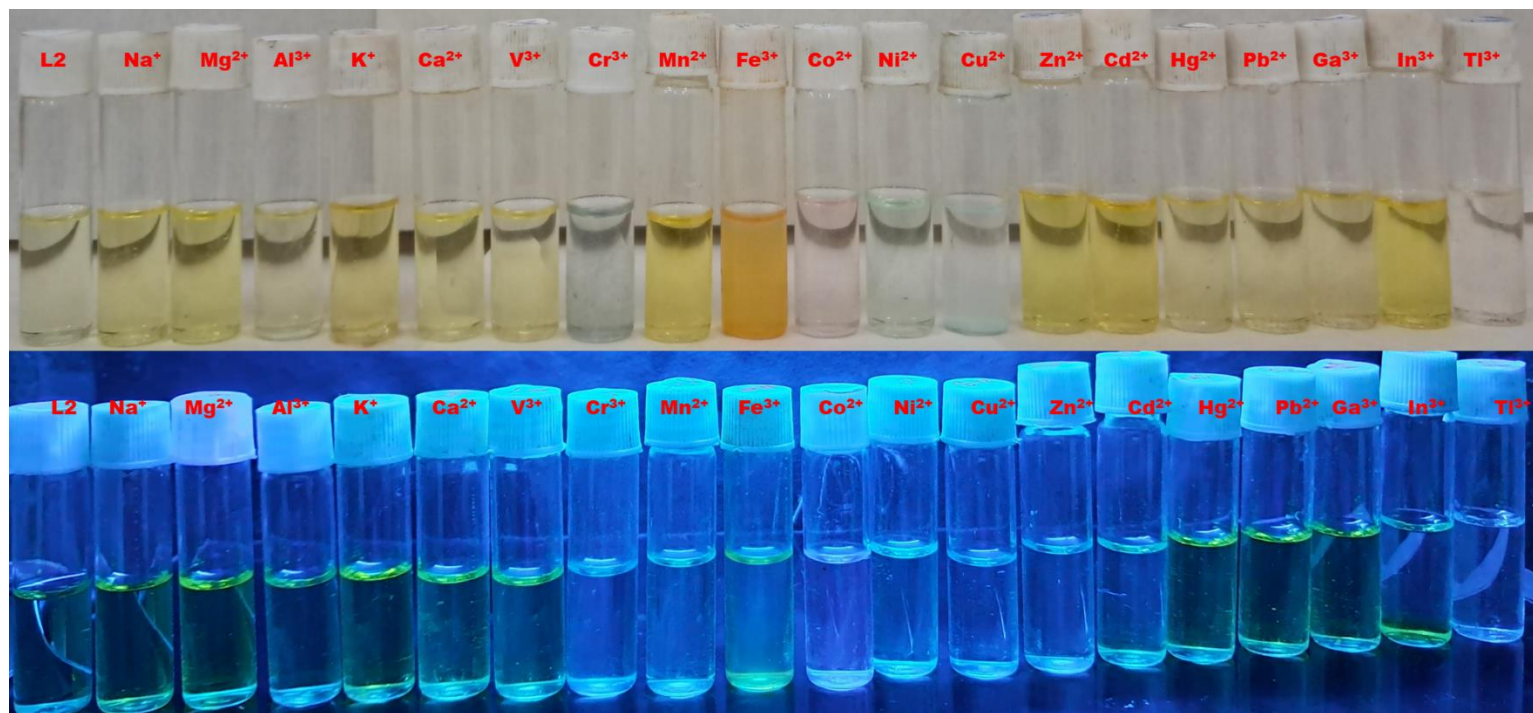

**Fig. S8** Color of NO<sub>2</sub>-H<sub>4</sub>L in absence and in the presence of various metal ions viewed under normal light (upper row) and UV light (lower row). L<sub>2</sub> in the picture denotes NO<sub>2</sub>-H<sub>4</sub>L.

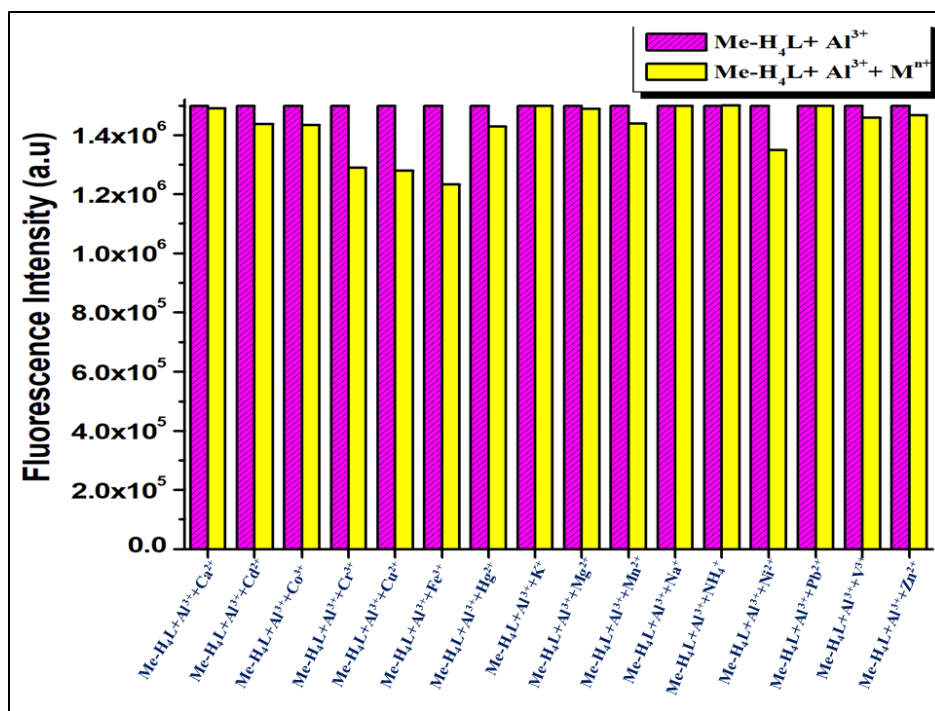

**Fig. S9** Fluorescence intensity of Me-H<sub>4</sub>L (40 μM) + Al<sup>3+</sup> (80 μM) at 535 nm in the presence of different metal ions (3 eq.) in 10 mM HEPES buffer in H<sub>2</sub>O/DMF = 4:1 (v/v) (pH 7.4) at room temperature.

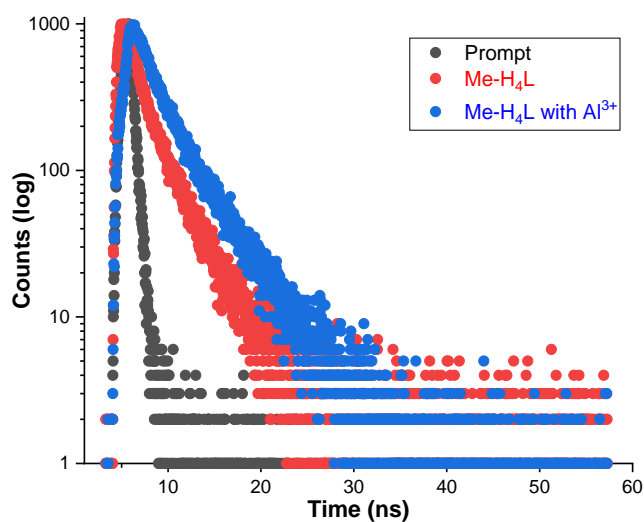

**Fig. S10** Fluorescence excited state decay behavior of Me-H<sub>4</sub>L and its complex with Al<sup>3+</sup>

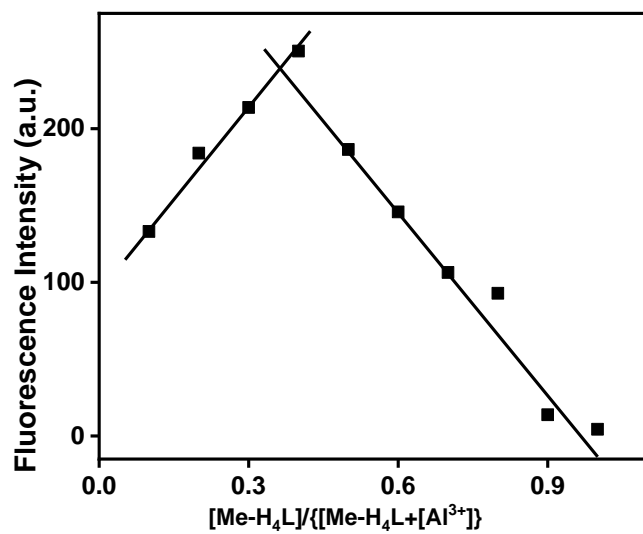

Fig. S11 Job's plot analysis indicating 1:2 (L/M) stoichiometry.

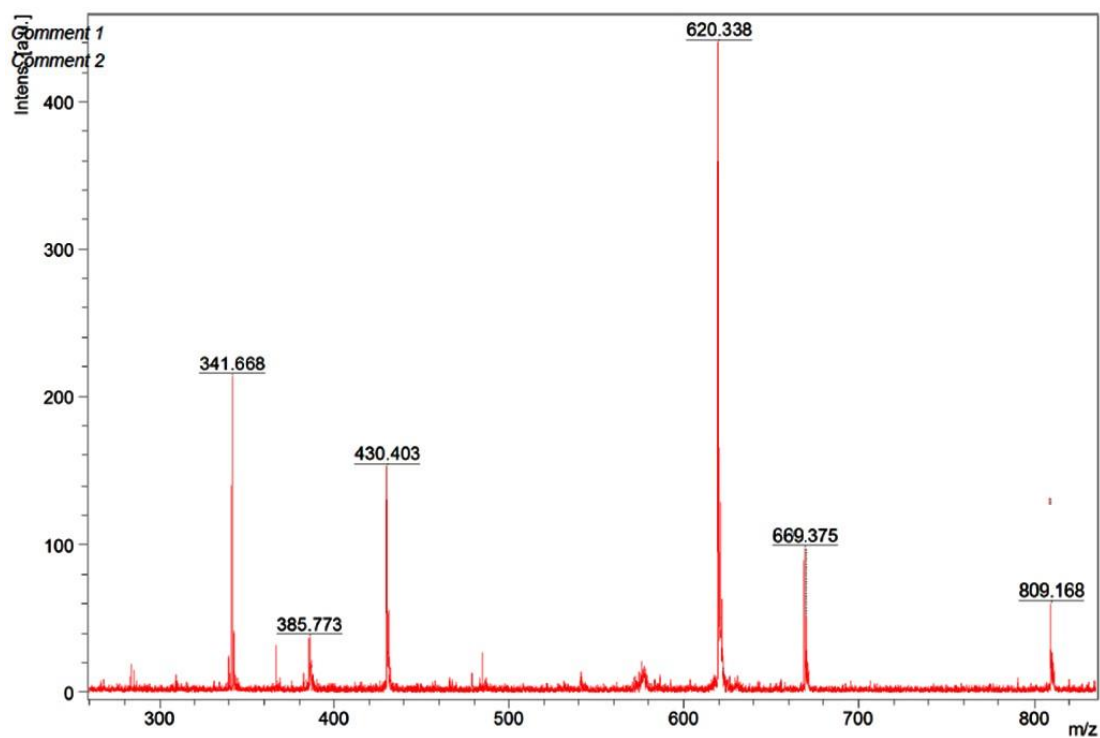

Fig. S12 ESI mass spectrum of Al-probe complex of Me-H<sub>4</sub>L.

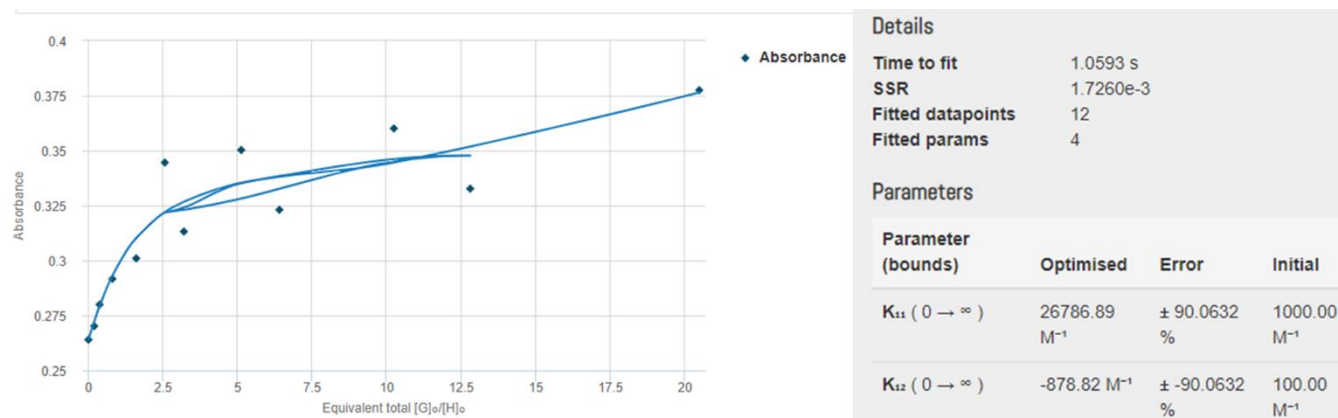

**Fig. S13** A plot of absorbance of Me-H<sub>4</sub>L at 445 nm against  $[G]_0/[H]_0$ . Here  $[G]_0$  denotes concentration of guest i.e. concentration of Al<sup>3+</sup> and  $[H]_0$  denotes concentration of host i.e. concentration of Me-H<sub>4</sub>L. Association constant has been determined as  $2.68 \times 10^4 \text{ M}^{-2}$  by using a software found at <http://app.supramolecular.org/>.



Limit of detection (LOD) for Me-H<sub>4</sub>L has been determined by 3 $\sigma$  method by the following equation:

$$DL = K \cdot Sb1/S$$

where K = 2 or 3 (3 in this case); here Sb1 is the standard deviation of the blank Me-H<sub>4</sub>L solution; and S is the slope of the calibration curve obtained from Linear dynamic plot of F.I. vs [Al<sup>3+</sup>] in M. The LOD of Me-H<sub>4</sub>L has been calculated to be  $9.65 \times 10^{-6}$  M for Al<sup>3+</sup>.

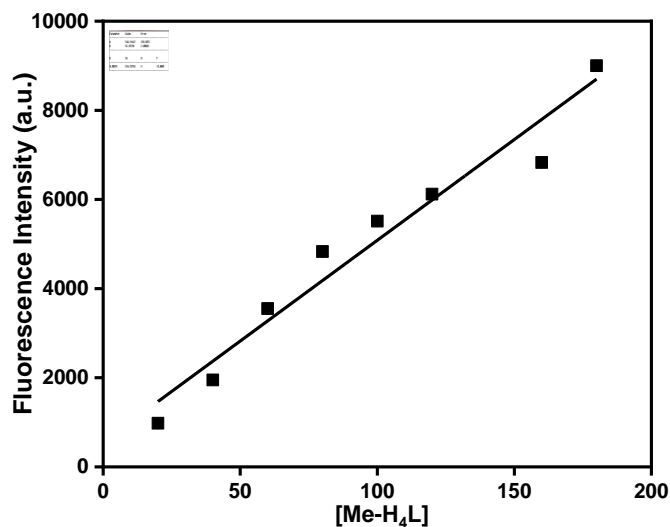

**Fig. S14** Determination of Sb1 of the blank, Me-H<sub>4</sub>L solution.

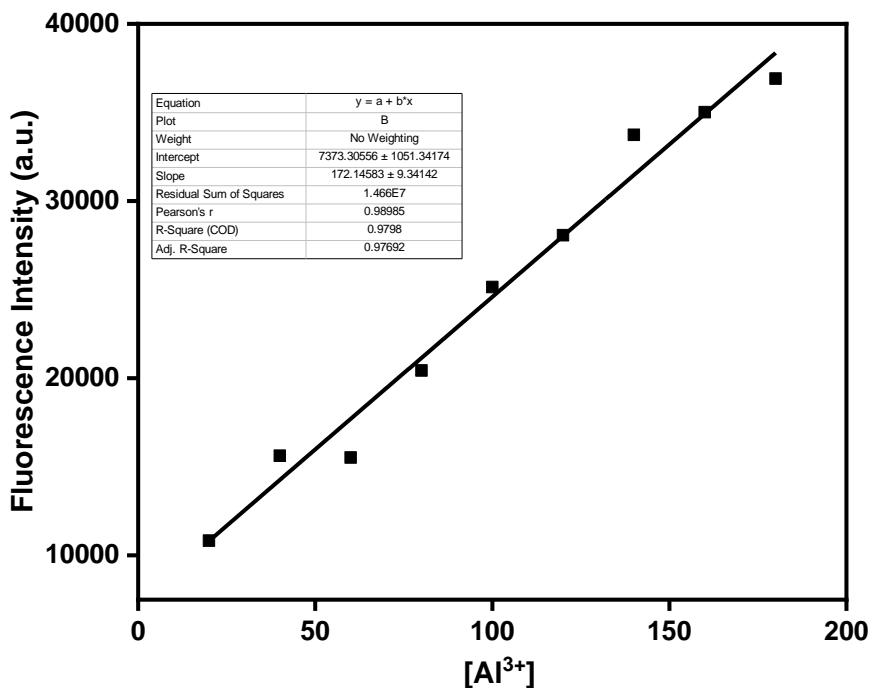

**Fig. S15** Linear dynamic plot of F.I. vs. [Al<sup>3+</sup>] for the determination of S (slope); [Me-H<sub>4</sub>L] = 40  $\mu$ M

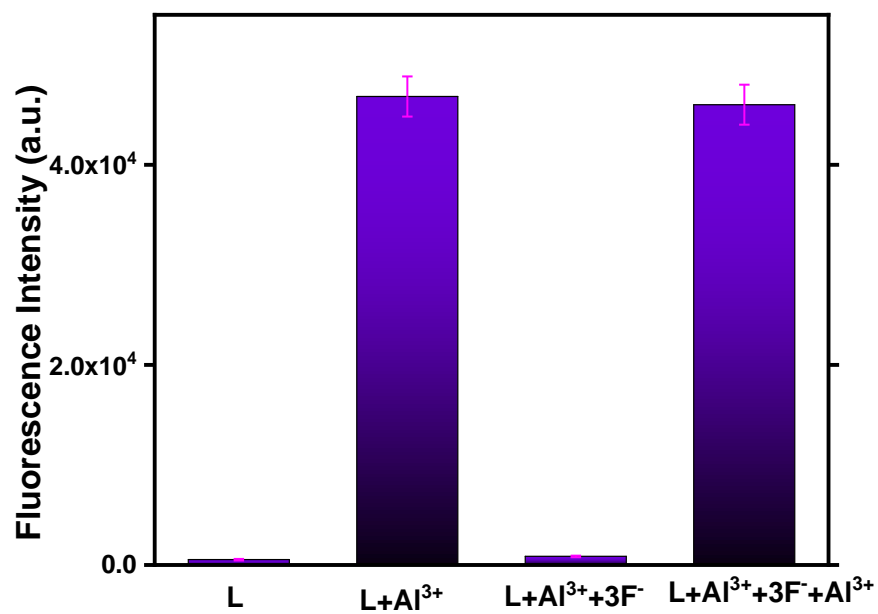

**Fig. S16** Fluorescence Intensity of Me-H<sub>4</sub>L at 535 nm after sequential addition of Al<sup>3+</sup> and F<sup>-</sup> indicating the reversible character of the probe.

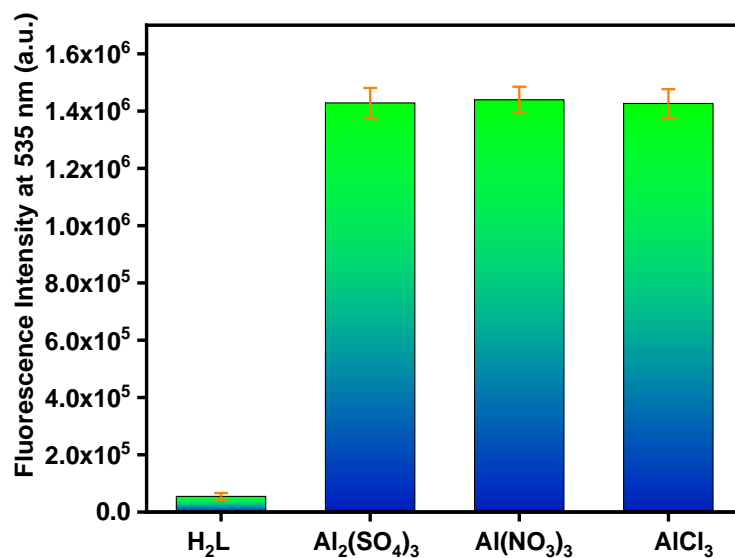

**Fig. S17** Fluorescence Intensity of Me-H<sub>4</sub>L at 535 nm in the presence of various salts of Al<sup>3+</sup>.

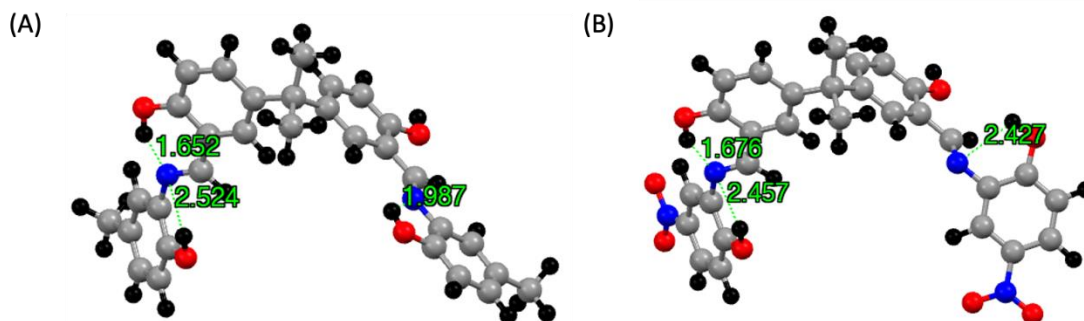

**Fig. S18** Hydrogen bonding within the probes between phenolic -OH and Schiff base nitrogen (a) Me-H<sub>4</sub>L and (b) NO<sub>2</sub>-H<sub>4</sub>L.

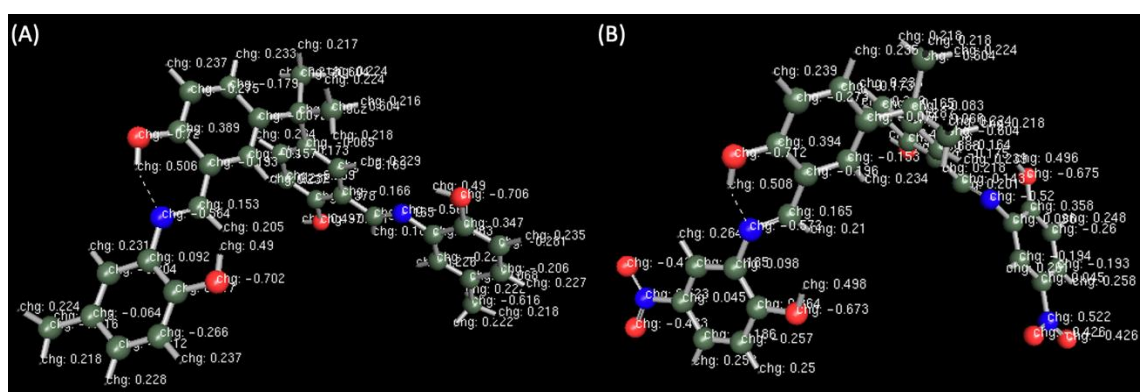

**Fig. S19** NBO population data of (a) Me-H<sub>4</sub>L and (b) NO<sub>2</sub>-H<sub>4</sub>L.

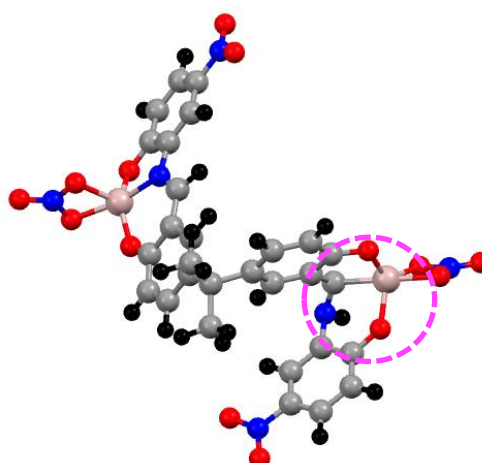

**Fig. S20** Al<sup>3+</sup> complex with NO<sub>2</sub>-H<sub>4</sub>L, the purple circle showed Al-carbon bond formation instead of Al-nitrogen of Schiff base.

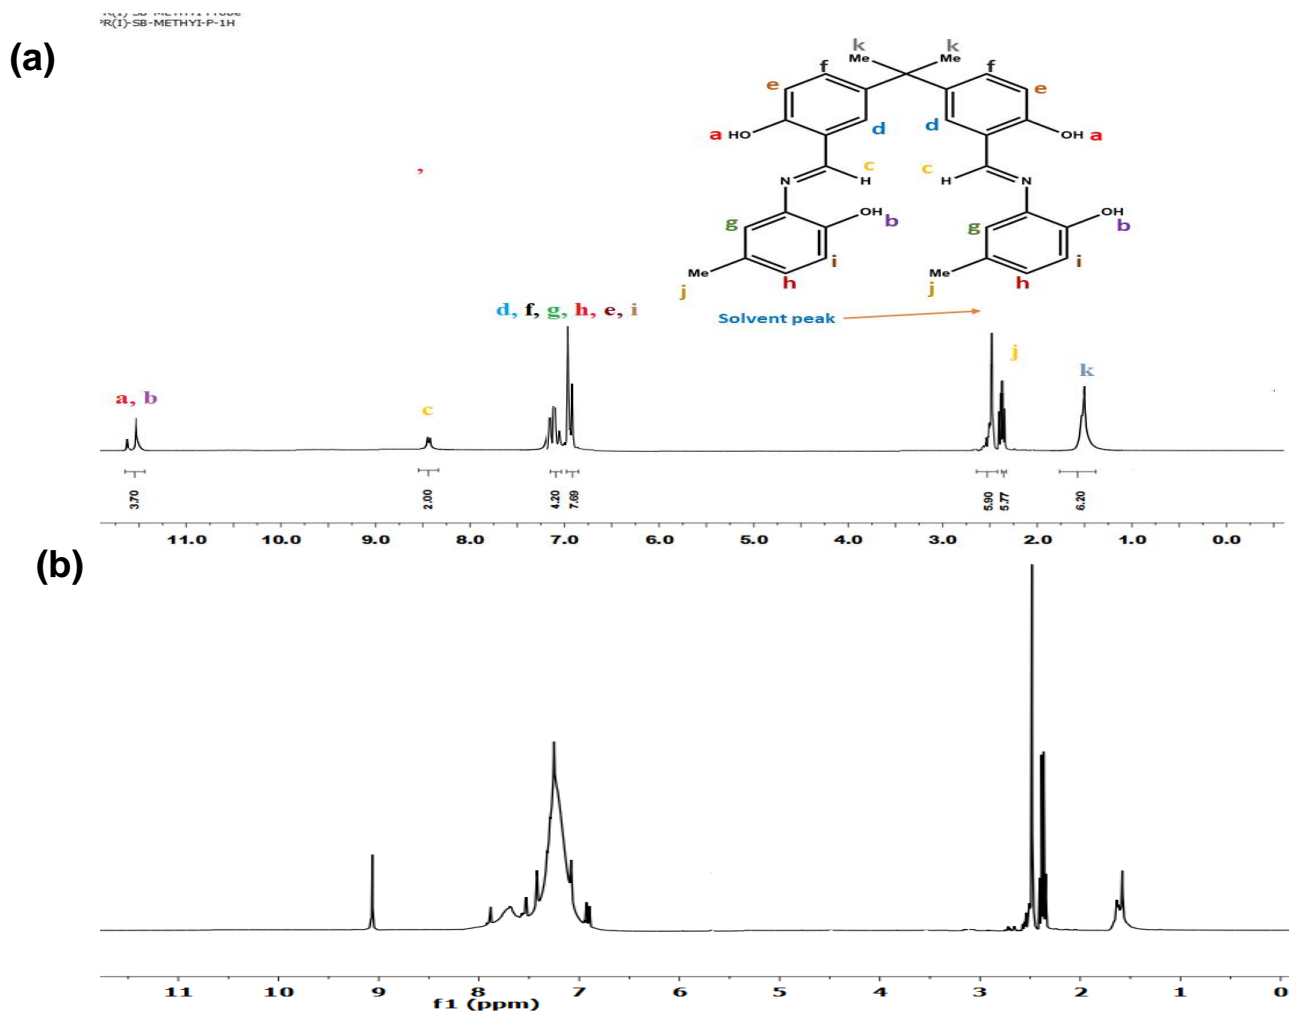

**Fig. S20** <sup>1</sup>H NMR spectra of (a) Me-H<sub>4</sub>L and (b) Me-H<sub>4</sub>L with Al<sup>3+</sup> in DMSO-d<sub>6</sub>.

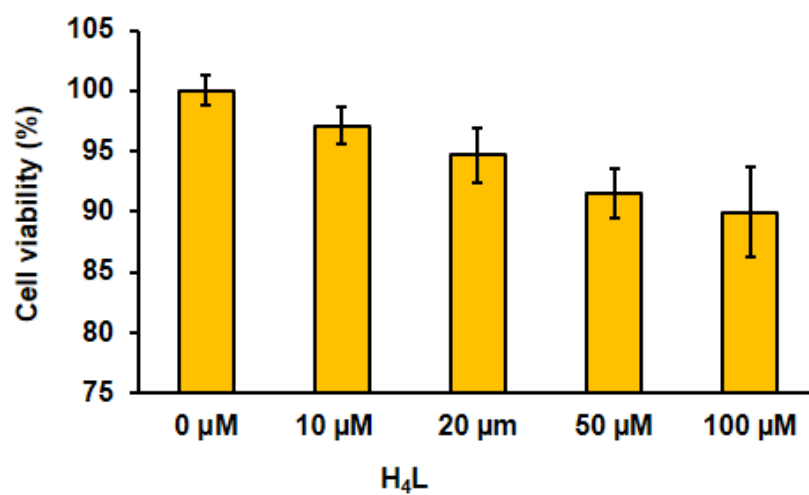

**Fig. S21** Cell viability (%) of HepG2 cells treated with different concentrations (10-100 μM) of Me-H<sub>4</sub>L for 6 h determined by MTT assay. Here H<sub>4</sub>L denotes concentration of Me-H<sub>4</sub>L.

Table S1 Me-H<sub>4</sub>L optimized coordinates.

total energy = -1607.75067560487 Hartree

67

|   |            |            |            |
|---|------------|------------|------------|
| C | -4.0519227 | 2.1574225  | 2.7621872  |
| C | -3.2826824 | 1.0072417  | 3.0006150  |
| C | -3.8902461 | -0.2653463 | 2.9133234  |
| C | -5.2622222 | -0.3414774 | 2.5885422  |
| C | -6.0382102 | 0.7882810  | 2.3492258  |
| C | -5.4007632 | 2.0443926  | 2.4416545  |
| C | -7.5367686 | 0.7275081  | 2.0158120  |
| C | -7.7922598 | 1.5080243  | 0.7150197  |
| C | -6.9721743 | 1.2892932  | -0.3935222 |
| C | -7.1838255 | 1.9342995  | -1.6264692 |
| C | -8.2702381 | 2.8482196  | -1.7601700 |
| C | -9.0951995 | 3.0753098  | -0.6493312 |
| C | -8.8568930 | 2.4166359  | 0.5576959  |
| C | -8.0253557 | -0.7210534 | 1.7992462  |
| C | -8.3142985 | 1.3165249  | 3.2134655  |
| O | -1.9656093 | 1.0752111  | 3.3111153  |
| O | -8.5039454 | 3.4897245  | -2.9121025 |
| C | -6.2868092 | 1.6842484  | -2.7393313 |
| C | -3.0984800 | -1.4684525 | 3.1527414  |
| N | -3.6020044 | -2.6504464 | 3.0994010  |
| N | -6.4580057 | 2.2597642  | -3.8857171 |
| C | -2.8647930 | -3.8190789 | 3.3163891  |
| C | -5.6089711 | 2.0604522  | -4.9880061 |

C -3.6522913 -4.9999237 3.2527282  
C -3.0577896 -6.2491933 3.4480193  
C -1.6856295 -6.3285640 3.7037175  
C -0.8793515 -5.1772400 3.7693465  
C -1.4881816 -3.9303315 3.5729550  
C -5.2634626 3.1832382 -5.7579396  
C -4.4115692 3.0993934 -6.8662532  
C -3.9252672 1.8305730 -7.2199140  
C -4.2914574 0.6912628 -6.4992388  
C -5.1304440 0.7864891 -5.3847682  
O -5.4597841 -0.3688916 -4.7388627  
C -4.0415714 4.3374397 -7.6487299  
O -4.9754001 -4.8856899 3.0035700  
C 0.6052027 -5.2721833 4.0373836  
H -3.5786679 3.1412062 2.8260868  
H -5.6913955 -1.3398334 2.5280639  
H -5.9715605 2.9552326 2.2461577  
H -6.1261974 0.6012670 -0.3149623  
H -9.9238795 3.7795252 -0.7485374  
H -9.5254962 2.6261411 1.3933125  
H -9.0923467 -0.7108740 1.5229546  
H -7.4709729 -1.2202853 0.9881237  
H -7.9195227 -1.3229187 2.7173583  
H -9.4036141 1.2251857 3.0703856  
H -8.0751327 2.3802124 3.3748907  
H -8.0485374 0.7645421 4.1298248  
H -1.6717705 2.0033466 3.3367069  
H -7.7909828 3.1823221 -3.5669557  
H -5.4405057 1.0036127 -2.5503642

|   |            |            |            |
|---|------------|------------|------------|
| H | -2.0361511 | -1.3019003 | 3.3838579  |
| H | -3.6760394 | -7.1480324 | 3.3978511  |
| H | -1.2294209 | -7.3108809 | 3.8549333  |
| H | -0.8734814 | -3.0281928 | 3.6186453  |
| H | -5.6697622 | 4.1493986  | -5.4477242 |
| H | -3.2613974 | 1.7258491  | -8.0822838 |
| H | -3.9345324 | -0.2984588 | -6.7927613 |
| H | -6.2437590 | -0.2377089 | -4.1769296 |
| H | -4.9377138 | 4.8351963  | -8.0603072 |
| H | -3.5264234 | 5.0776624  | -7.0108174 |
| H | -3.3735177 | 4.0929981  | -8.4901401 |
| H | -5.1230777 | -3.9135809 | 2.9053221  |
| H | 0.9135402  | -6.3150626 | 4.2151499  |
| H | 1.1938631  | -4.8874047 | 3.1850582  |
| H | 0.8941299  | -4.6776418 | 4.9223019  |

Table S2 NO<sub>2</sub>-H<sub>4</sub>L optimized coordinates.

total energy = -1937.78092466458 Hartree

65

|   |            |             |            |
|---|------------|-------------|------------|
| C | 8.7228491  | -15.3289658 | -2.0681475 |
| C | 9.3195331  | -14.0678168 | -1.9041252 |
| C | 10.6391221 | -13.8644799 | -2.3629607 |



C 11.3285688 -14.9357383 -2.9714930  
C 10.7489579 -16.1877559 -3.1455851  
C 9.4265946 -16.3601872 -2.6798081  
C 11.4724390 -17.3697201 -3.8079045  
C 10.6228978 -17.8735269 -4.9878063  
C 10.0800943 -16.9576377 -5.8891779  
C 9.3382885 -17.3600129 -7.0168858  
C 9.1260464 -18.7493631 -7.2569483  
C 9.6655497 -19.6747033 -6.3517966  
C 10.3962674 -19.2403924 -5.2458730  
C 12.8549180 -16.9653179 -4.3634284  
C 11.6907510 -18.4604648 -2.7363864  
O 8.6706315 -13.0338508 -1.3218268  
O 8.4220914 -19.1790603 -8.3110753  
C 8.7782381 -16.3615278 -7.9035979  
C 11.2648349 -12.5527911 -2.2260182  
N 12.4675882 -12.3155656 -2.6172758  
N 8.0936085 -16.6903263 -8.9524314  
C 13.0271492 -11.0400661 -2.4637333  
C 7.5396809 -15.7284274 -9.8128546  
C 13.5754529 -10.3984862 -3.5773406  
C 14.1481860 -9.1312438 -3.4444532  
C 14.2214771 -8.4838108 -2.2058370  
C 13.7151389 -9.1320163 -1.0860845  
C 13.1220410 -10.4001635 -1.1953867  
C 6.1894817 -15.8308593 -10.1548142  
C 5.6118065 -14.8859763 -11.0045349  
C 6.3598964 -13.8385137 -11.5543379  
C 7.7122259 -13.7542546 -11.2499932

C 8.3171666 -14.6875892 -10.3917709  
O 12.6733531 -10.9782553 -0.0630352  
O 9.6387082 -14.5557996 -10.1659250  
N 14.6936190 -8.4761686 -4.6260575  
O 15.1865578 -7.3609911 -4.4961072  
O 14.6364353 -9.0676986 -5.6985407  
N 4.1955907 -15.0018277 -11.3303914  
O 3.7002028 -14.1576170 -12.0678732  
O 3.5639348 -15.9373276 -10.8527816  
H 7.6994576 -15.4880137 -1.7176871  
H 12.3417371 -14.7271736 -3.3115630  
H 8.9299950 -17.3243688 -2.8121751  
H 10.2195784 -15.8860073 -5.7252321  
H 9.4987086 -20.7389445 -6.5297770  
H 10.7959992 -19.9975133 -4.5704588  
H 13.3196558 -17.8338765 -4.8579201  
H 12.7735552 -16.1565090 -5.1073743  
H 13.5294695 -16.6315622 -3.5573225  
H 12.2845220 -19.3003558 -3.1328513  
H 10.7369734 -18.8616689 -2.3569671  
H 12.2437438 -18.0317816 -1.8846755  
H 7.7715203 -13.3008761 -1.0588744  
H 8.1210992 -18.3612822 -8.8227198  
H 8.9412268 -15.3054801 -7.6293262  
H 10.6334488 -11.7608328 -1.7902416  
H 13.5385519 -10.8879121 -4.5483506  
H 14.6779104 -7.4986372 -2.1284152  
H 13.7697591 -8.6698329 -0.0989376  
H 5.5904461 -16.6393882 -9.7408031

H 5.8861049 -13.1160908 -12.2166457  
H 8.3343493 -12.9653234 -11.6758224  
H 12.4193662 -11.9061394 -0.2251923  
H 9.9998464 -15.3381319 -9.7092623

Table S3 Al- Me-H<sub>4</sub>L complex optimized coordinates.

total energy = -2650.65235020479 Hartree

73

C -5.3454951 1.5231757 3.1993514  
C -4.3804220 0.5077346 3.3456524  
C -4.6765223 -0.7796922 2.8031081  
C -5.9110350 -0.9916607 2.1358690  
C -6.8472861 0.0176740 1.9743505  
C -6.5337276 1.2833805 2.5250355  
C -8.1947076 -0.1778029 1.2655653  
C -8.3285369 0.8864797 0.1634776  
C -7.2791760 1.0911486 -0.7274568  
C -7.3475384 2.0302621 -1.7806409  
C -8.5410443 2.7997590 -1.9588142  
C -9.6049511 2.5756420 -1.0704156  
C -9.4964254 1.6503232 -0.0346441  
C -8.3077347 -1.5656831 0.5987768  
C -9.3125232 -0.0660045 2.3258612  
O -3.2479758 0.7825337 3.9857195

O -8.6826611 3.7003108 -2.9287565  
C -6.2435195 2.1070379 -2.6977585  
C -3.8070373 -1.9056218 2.9958540  
N -2.6183961 -1.8039822 3.5199157  
N -6.1733067 2.9924949 -3.6494840  
C -1.7989500 -2.8660134 3.9443321  
C -5.2542267 3.0034296 -4.7146442  
C -0.7663082 -2.4052867 4.8000097  
C 0.1172421 -3.3406011 5.3522299  
C -0.0297377 -4.6940074 5.0411703  
C -1.0475801 -5.1599821 4.1828853  
C -1.9369004 -4.2250035 3.6406108  
C -4.0663248 2.2718356 -4.8241223  
C -3.2833725 2.3728405 -5.9796633  
C -3.7311122 3.2163631 -7.0181105  
C -4.9148222 3.9504831 -6.9204852  
C -5.6915737 3.8569070 -5.7591067  
O -6.8423164 4.5320999 -5.5790363  
C -1.9829224 1.6157878 -6.1122934  
O -0.6945323 -1.0826642 5.0422754  
C -1.1567358 -6.6289287 3.8477583  
H -5.1258659 2.5072211 3.6181702  
H -6.0989817 -1.9933796 1.7483555  
H -7.2440223 2.1061922 2.4124142  
H -6.3563602 0.5156491 -0.6205333  
H -10.5200755 3.1556441 -1.2054075  
H -10.3515453 1.5274713 0.6307598  
H -9.2712545 -1.6417818 0.0687618  
H -7.5040717 -1.7331395 -0.1365402

H -8.2697352 -2.3751762 1.3469426  
H -10.3033346 -0.2729598 1.8888264  
H -9.3430654 0.9328711 2.7907782  
H -9.1370170 -0.8065909 3.1232780  
H -5.4616676 1.3420969 -2.6104851  
H -4.1995408 -2.8963574 2.7341832  
H 0.9108302 -2.9965852 6.0189071  
H 0.6690577 -5.4147134 5.4758666  
H -2.7345489 -4.5601648 2.9736614  
H -3.7423814 1.6255615 -4.0051263  
H -3.1310474 3.3007450 -7.9288769  
H -5.2468560 4.5988296 -7.7340868  
H -1.1153279 2.3002374 -6.0798250  
H -1.8600351 0.8820651 -5.2994331  
H -1.9295886 1.0745980 -7.0730834  
H -1.1156338 -7.2525412 4.7577605  
H -2.0990447 -6.8527162 3.3221685  
H -0.3247833 -6.9545792 3.1964524  
Al -7.4385559 4.4338534 -3.9156653  
Al -1.7582545 -0.1376262 3.9904805  
N -7.5214833 6.6984196 -3.2548573  
O -7.5236666 7.8334231 -2.8968604  
O -8.3929509 6.1728559 -4.0278549  
O -6.6187162 5.8343249 -2.8991532  
N -0.2585441 1.3183508 2.8930740  
O 0.4934434 2.0256448 2.3009190  
O -0.8130478 0.2641031 2.3740620  
O -0.6246782 1.4905180 4.1052480

**Table S4** Different parameters of recently published chemosensors for Al<sup>3+</sup>

| Entry no. | Probes                                                                              | Sensor for                                                                         | Solvent                                                 | Excitation (nm)/Emission (nm)                                                                    | LOD for Al <sup>3+</sup> (M)    | Binding constant (K <sub>a</sub> ) with Al <sup>3+</sup> M <sup>-2</sup> | Application                         | Ref |
|-----------|-------------------------------------------------------------------------------------|------------------------------------------------------------------------------------|---------------------------------------------------------|--------------------------------------------------------------------------------------------------|---------------------------------|--------------------------------------------------------------------------|-------------------------------------|-----|
| 1         | 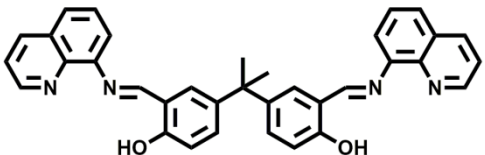   | Zn <sup>2+</sup> ,<br>Al <sup>3+</sup> ,<br>F <sup>-</sup>                         | EtOH-H <sub>2</sub> O (v/v, 9/1)                        | 395/560<br>(Zn <sup>2+</sup> )<br>395/530<br>(Al <sup>3+</sup> )<br>420/610<br>(F <sup>-</sup> ) | 3.68 (±0.21) × 10 <sup>-6</sup> | (1.53 ± 0.18) × 10 <sup>10</sup> M <sup>-2</sup>                         | NA                                  | 59  |
| 2         |    | Al <sup>3+</sup> ,<br>CN <sup>-</sup>                                              | CH <sub>3</sub> CN: HEPES<br>(80:20, v:v)               | 382/462<br>(Al <sup>3+</sup> )<br>355/516<br>(CN <sup>-</sup> )                                  | 2.66 × 10 <sup>-9</sup>         | 0.607 × 10 <sup>10</sup> M <sup>-2</sup>                                 | Test paper strip                    | 60  |
| 3         |   | Al <sup>3+</sup>                                                                   | DMF                                                     | 365/514                                                                                          | 4.22 × 10 <sup>-8</sup>         | 4.82 × 10 <sup>4</sup> M <sup>-1</sup>                                   | Logic gate and real sample analysis | 61  |
| 4         |  | Al <sup>3+</sup> ,<br>Ga <sup>3+</sup> ,<br>In <sup>3+</sup> ,<br>Tl <sup>3+</sup> | HEPES buffer in<br>(1:9, v/v)<br>water:ethanol (pH 7.4) | 495/555<br>(for all)                                                                             | 2.66 × 10 <sup>-9</sup>         | 5.01 × 10 <sup>4</sup> M <sup>-1</sup>                                   | Real sample                         | 62  |

|   |                                                                                    |                                                                              |                                                            |                      |                       |                                   |                                                    |    |
|---|------------------------------------------------------------------------------------|------------------------------------------------------------------------------|------------------------------------------------------------|----------------------|-----------------------|-----------------------------------|----------------------------------------------------|----|
| 5 | 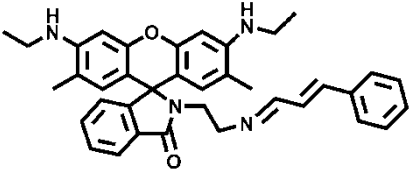  | Al <sup>3+</sup><br>Ga <sup>3+</sup><br>In <sup>3+</sup><br>Tl <sup>3+</sup> | HEPES buffer in<br>(1:9, v/v)<br>water:ethanol (pH<br>7.4) | 495/558<br>(for all) | $2.8 \times 10^{-8}$  | ---                               | Test paper<br>strip, real<br>sample                | 32 |
| 6 |   | Al <sup>3+</sup><br>Hg <sup>2+</sup>                                         | HEPES buffer in<br>(1:9, v/v)<br>water:ethanol (pH<br>7.4) | 500/550<br>(for all) | $6.54 \times 10^{-9}$ | $4.44 \times 10^4 \text{ M}^{-1}$ | Test paper<br>strip, real<br>sample,<br>logic gate | 63 |
| 7 |   | Al <sup>3+</sup>                                                             | HEPES buffer/DMF<br>(4:1 (v/v, pH 7.4)                     | 430/519              | $4.6 \times 10^{-7}$  | $6.95 \times 10^8 \text{ M}^{-2}$ | Plant root                                         | 35 |
| 8 |  | Al <sup>3+</sup>                                                             | DMF/H <sub>2</sub> O (v/v, 3/7)                            | 430/620              | $4.01 \times 10^{-8}$ | $1.83 \times 10^4 \text{ M}^{-1}$ | Cell imaging                                       | 64 |

|    |                                                                                     |                                                                 |                                                      |                    |                                                    |                                        |                                                    |    |
|----|-------------------------------------------------------------------------------------|-----------------------------------------------------------------|------------------------------------------------------|--------------------|----------------------------------------------------|----------------------------------------|----------------------------------------------------|----|
| 9  | 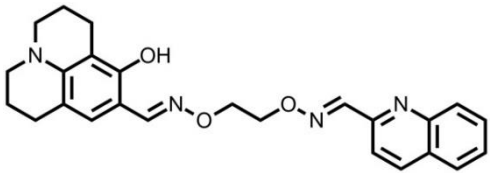   | Al <sup>3+</sup><br>Zn <sup>2+</sup>                            | DMSO/H <sub>2</sub> O (9/1, v/v,<br>HEPES, pH = 7.4) | 350/426<br>350/451 | 2.1 × 10 <sup>-7</sup><br>9.7 × 10 <sup>-8</sup>   | 1.07 × 10 <sup>5</sup> M <sup>-1</sup> | ---                                                | 65 |
| 10 |    | Al <sup>3+</sup>                                                | DMF                                                  | 340/434            | 1.56 × 10 <sup>-8</sup>                            | 1.07 × 10 <sup>6</sup> M <sup>-1</sup> | Test papers<br>and sample<br>of stomach<br>tablets | 66 |
| 11 |    | Al <sup>3+</sup><br>H <sub>2</sub> PO <sub>4</sub> <sup>-</sup> | HEPES buffer                                         | 365/550            | 5.7 × 10 <sup>-8</sup><br>1.48 × 10 <sup>-7</sup>  | ---                                    | Food<br>samples,<br>and cell<br>imaging            | 67 |
| 12 |  | Al <sup>3+</sup><br>Zn <sup>2+</sup>                            | DMSO/H <sub>2</sub> O (9/1, v/v,<br>HEPES, pH = 7.4) | 354/493<br>354/434 | 3.99 × 10 <sup>-8</sup><br>1.33 × 10 <sup>-8</sup> | 2.08 × 10 <sup>7</sup> M <sup>-1</sup> | Latent<br>fingerprint<br>analysis                  | 68 |



|    |                                                                                     |                                      |                                                       |         |                                                    |                                        |                                 |    |
|----|-------------------------------------------------------------------------------------|--------------------------------------|-------------------------------------------------------|---------|----------------------------------------------------|----------------------------------------|---------------------------------|----|
| 13 | 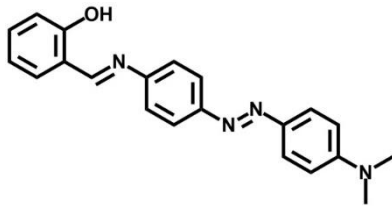   | Al <sup>3+</sup>                     | HEPES buffer/DMSO solution (2/8 v/v)                  | 380/512 | 1.53 × 10 <sup>-7</sup>                            | 2.36 × 10 <sup>4</sup> M <sup>-1</sup> | Cell imaging                    | 69 |
| 14 |    | Al <sup>3+</sup><br>Hg <sup>2+</sup> | DMSO/H <sub>2</sub> O (v/v = 4:6)                     | .....   | 4.34 × 10 <sup>-9</sup><br>5.70 × 10 <sup>-8</sup> | .....                                  | Test kit preparation            | 70 |
| 15 |    | Al <sup>3+</sup>                     | Methanol/urotropine buffer medium (1:1, v/v, pH 4.5). | 385/459 | 31.6 × 10 <sup>-9</sup>                            | 8.87 × 10 <sup>4</sup> M <sup>-2</sup> | Zebrafish imaging               | 71 |
| 16 |  | Al <sup>3+</sup>                     | DMF:H <sub>2</sub> O (9:1, v/v)                       | 260/446 | 8.64 × 10 <sup>-8</sup> M                          | 7.19 × 10 <sup>4</sup> M <sup>-1</sup> | Testing of actual water samples | 72 |

|    |                                                                                   |                  |                                               |         |                         |                                        |                                     |              |
|----|-----------------------------------------------------------------------------------|------------------|-----------------------------------------------|---------|-------------------------|----------------------------------------|-------------------------------------|--------------|
| 17 | 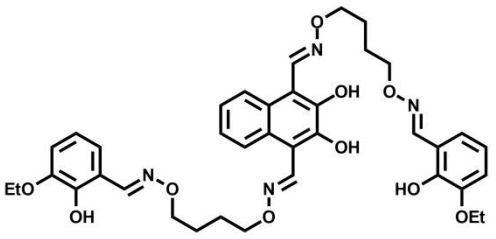 | Al <sup>3+</sup> | H <sub>2</sub> O                              | 400/460 | 2.20 x 10 <sup>-8</sup> | 7.74 × 10 <sup>6</sup> M <sup>-1</sup> | Cytotoxicity toward hepatocytes     | 73           |
| 18 |  | Al <sup>3+</sup> | HEPES buffer in water/DMF (4:1 (v/v), pH 7.4) | 445/535 | 9.65 x 10 <sup>-6</sup> | 2.68 × 10 <sup>4</sup> M <sup>-2</sup> | Cell imaging and plant root imaging | Present work |
